# Supplementary material for: Association of C-reactive protein and non-steroidal anti-inflammatory drugs with cardiovascular events in patients with psoriatic arthritis: a time-dependent Cox regression analysis
Source: PubMed Central journal article supplement — Ther Adv Musculoskelet Dis. 2021 Jun 30;13:1759720X211027712. doi: 10.1177/1759720X211027712 (PMC8252335; doi:10.1177/1759720x211027712), 2021-06-30
Supplement: sj-pdf-1-tab-10.1177_1759720X211027712.pdf [file sj-pdf-1-tab-10.1177_1759720X211027712.pdf]

Supplementary table 2. Differences in NSAIDs equivalent score between CVD+ve and CVD-ve group

|                                                   | CVD-ve<br>n=170     | CVD+ve<br>n=30     | p-value |
|---------------------------------------------------|---------------------|--------------------|---------|
| Time-averaged NSAIDs equivalent score             | 67.4 (15.9 – 165.5) | 62.2 (4.2 – 125.4) | 0.455   |
| Time-averaged COX2 selective equivalent score     | 0.00 (0.0 – 0.1)    | 0.00 (0.0 – 0.1)   | 0.954   |
| Time-averaged non COX2 selective equivalent score | 58.1 (11.2 – 157.8) | 46.9 (2.0 – 121.7) | 0.347   |

*NSAIDs, nonsteroidal anti-inflammatory drugs*

Supplementary table 3. Univariable Cox regression model using NSAIDs equivalent score as predictors of CV events.

|                                                   | HR 95% CI         | p-value |
|---------------------------------------------------|-------------------|---------|
| Time-averaged NSAIDs equivalent score             | 1.00 (0.99, 1.00) | 0.673   |
| Time-averaged COX2 selective equivalent score     | 1.00 (0.99, 1.01) | 0.675   |
| Time-averaged non COX2 selective equivalent score | 1.00 (0.99, 1.00) | 0.746   |

*NSAIDs, nonsteroidal anti-inflammatory drugs*
