# Supplementary material for: Association of C-reactive protein and non-steroidal anti-inflammatory drugs with cardiovascular events in patients with psoriatic arthritis: a time-dependent Cox regression analysis
Source: PubMed Central journal article supplement — Ther Adv Musculoskelet Dis. 2021 Jun 30;13:1759720X211027712. doi: 10.1177/1759720X211027712 (PMC8252335; doi:10.1177/1759720x211027712), 2021-06-30
Supplement: sj-pdf-2-tab-10.1177_1759720X211027712.pdf [file sj-pdf-2-tab-10.1177_1759720X211027712.pdf]

Supplementary table 4. Univariable analysis with time-dependent Cox proportional hazard regression for predicting MACE only

| Variables <sup>^</sup>          | Total person-time intervals | Time-dependent HR (95% CI) | p value |
|---------------------------------|-----------------------------|----------------------------|---------|
| CRP                             | 1045                        | 1.01 (1.00, 1.05)          | 0.007*  |
| CRP>3 mg/L                      | 1045                        | 2.89 (0.56, 15.05)         | 0.206   |
| ESR                             | 1013                        | 1.01 (0.99, 1.04)          | 0.348   |
| MTX                             | 1237                        | 1.13 (0.26, 3.04)          | 0.850   |
| NSAIDs                          | 1237                        | 0.29 (0.07, 1.10)          | 0.068   |
| --COX 2 selective inhibitor     |                             | 2.63(0.32, 21.37)          | 0.366   |
| --Non-COX 2 selective inhibitor |                             | 0.31 (0.08, 1.21)          | 0.091   |
| bDMARDs                         | 1618                        | 0.58 (0.07, 4.54)          | 0.604   |
| FRS at baseline                 | N/A                         | 4.23 (1.12, 16.02)         | 0.034*  |

<sup>^</sup>variables are time-varying unless otherwise specified

\*statistically significant at  $p \leq 0.05$

MACE, major adverse cardiovascular events; HR, hazard ratio; CRP, C reactive protein; ESR, erythrocyte sedimentation rate; MTX, methotrexate; NSAIDs, nonsteroidal anti-inflammatory drugs; bDMARDs, biological disease-modifying antirheumatic drugs; FRS, Framingham Risk Score.

Supplementary table 5. Multivariable analysis with time-dependent Cox proportional hazard regression for predicting MACE only.

| Variables <sup>^</sup>             | Time-dependent HR<br>(95% CI) | p-value | Time-dependent<br>HR (95% CI) | p- value |
|------------------------------------|-------------------------------|---------|-------------------------------|----------|
| CRP                                | 1.03 (1.01, 1.05)             | 0.010*  | 1.03 (1.01, 1.05)             | 0.010*   |
| NSAIDs                             | 0.43 (0.09, 2.05)             | 0.292   | N/A                           | N/A      |
| Non-COX2<br>selective<br>inhibitor | N/A                           | N/A     | 0.46 (0.10, 2.21)             | 0.334    |
| bDMARDs                            | 1.05 (0.12, 9.10)             | 0.965   | 1.01 (0.12, 8.76)             | 0.990    |
| FRS<br>at<br>baseline              | 2.09 (0.46, 9.45)             | 0.339   | 2.10 (0.46, 9.51)             | 0.335    |

<sup>^</sup>variables are time-varying unless otherwise specified

\*statistically significant at  $p \leq 0.05$

MACE, major adverse cardiovascular events; HR, hazard ratio; CRP, C reactive protein; NSAIDs, nonsteroidal anti-inflammatory drugs; bDMARDs, biological disease-modifying antirheumatic drugs; FRS, Framingham Risk Score.
